# Supplementary material
Source: publisher site journal article supplement (https://www.spandidos-publications.com/8587/downloadSupplementary)

Figure S1. mRNA expression of Pon1 in kidneys of healthy donors and patients with LN from dataset GSE121239. \*P<0.05. Pon, paraoxonase; LN, lupus nephritis.

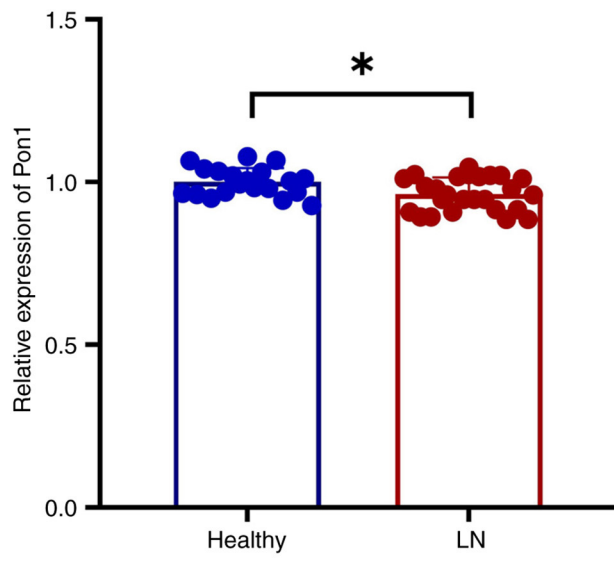

Figure S2. mRNA levels of Pon1 in HK-2 cells following si-Pon1 transfection. \*\*\*P<0.001. Pon, paraoxonase; si, small interfering.

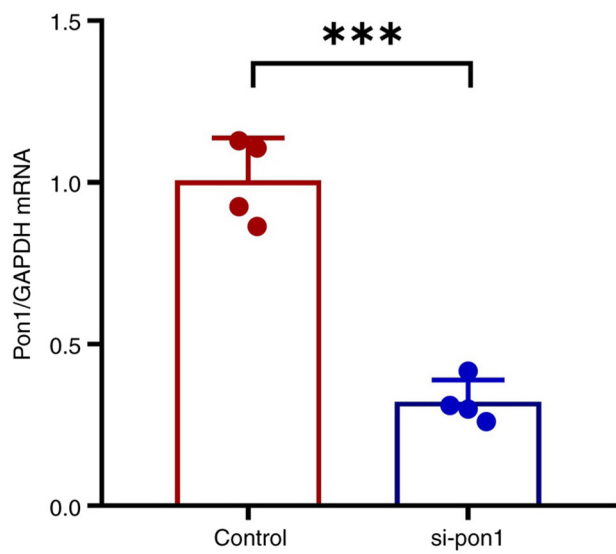

Supplement: Supplementary file 1 [file downloadSupplementary]
